# Supplementary material for: New Insights into the Complex Relationship between Weight and Maturity of Burgundy Truffles (Tuber aestivum)
Source: PLoS One. 2017 Jan 26;12(1):e0170375. doi: 10.1371/journal.pone.0170375 (PMC5268403; doi:10.1371/journal.pone.0170375)
Supplement: S1 Table — (XLSX) [file pone.0170375.s001.xlsx]

## Sheet: Hungary 2014
fruit body	g	maturation class
1	8	1
2	11	1
3	2	1
4	2	1
5	2	1
6	3	1
7	3	1
8	3	1
9	3	1
10	4	1
11	4	1
12	4	1
13	4	1
14	4	1
15	5	1
16	5	1
17	5	1
18	5	1
19	5	1
20	5	1
21	5	1
22	5	1
23	5	1
24	6	1
25	6	1
26	6	1
27	6	1
28	6	1
29	6	1
30	6	1
31	6	1
32	6	1
33	6	1
34	6	1
35	6	1
36	7	1
37	7	1
38	7	1
39	7	1
40	7	1
41	7	1
42	8	1
43	8	1
44	8	1
45	8	1
46	8	1
47	8	1
48	9	1
49	9	1
50	9	1
51	9	1
52	9	1
53	10	1
54	10	1
55	10	1
56	10	1
57	10	1
58	10	1
59	10	1
60	10	1
61	10	1
62	10	1
63	10	1
64	10	1
65	11	1
66	11	1
67	11	1
68	11	1
69	11	1
70	11	1
71	11	1
72	12	1
73	12	1
74	12	1
75	12	1
76	12	1
77	12	1
78	12	1
79	12	1
80	12	1
81	12	1
82	13	1
83	13	1
84	13	1
85	13	1
86	13	1
87	13	1
88	13	1
89	13	1
90	13	1
91	14	1
92	14	1
93	14	1
94	14	1
95	14	1
96	14	1
97	14	1
98	14	1
99	14	1
100	14	1
101	14	1
102	14	1
103	14	1
104	15	1
105	15	1
106	15	1
107	15	1
108	15	1
109	15	1
110	15	1
111	15	1
112	15	1
113	15	1
114	15	1
115	15	1
116	15	1
117	16	1
118	16	1
119	16	1
120	16	1
121	16	1
122	16	1
123	16	1
124	16	1
125	16	1
126	16	1
127	16	1
128	16	1
129	17	1
130	17	1
131	17	1
132	17	1
133	17	1
134	17	1
135	17	1
136	17	1
137	17	1
138	17	1
139	17	1
140	17	1
141	18	1
142	18	1
143	18	1
144	18	1
145	18	1
146	18	1
147	18	1
148	18	1
149	18	1
150	18	1
151	18	1
152	18	1
153	19	1
154	19	1
155	19	1
156	19	1
157	19	1
158	19	1
159	19	1
160	19	1
161	20	1
162	20	1
163	20	1
164	20	1
165	20	1
166	20	1
167	20	1
168	20	1
169	20	1
170	21	1
171	21	1
172	21	1
173	21	1
174	21	1
175	21	1
176	21	1
177	21	1
178	21	1
179	22	1
180	22	1
181	22	1
182	22	1
183	22	1
184	22	1
185	22	1
186	23	1
187	23	1
188	23	1
189	23	1
190	23	1
191	23	1
192	23	1
193	23	1
194	23	1
195	23	1
196	24	1
197	24	1
198	24	1
199	24	1
200	24	1
201	24	1
202	24	1
203	24	1
204	25	1
205	25	1
206	25	1
207	25	1
208	26	1
209	26	1
210	26	1
211	26	1
212	26	1
213	26	1
214	26	1
215	27	1
216	27	1
217	27	1
218	27	1
219	27	1
220	28	1
221	28	1
222	28	1
223	28	1
224	28	1
225	29	1
226	29	1
227	29	1
228	30	1
229	30	1
230	30	1
231	30	1
232	30	1
233	30	1
234	30	1
235	31	1
236	31	1
237	31	1
238	31	1
239	31	1
240	31	1
241	32	1
242	32	1
243	32	1
244	32	1
245	32	1
246	32	1
247	33	1
248	33	1
249	33	1
250	33	1
251	34	1
252	34	1
253	34	1
254	35	1
255	35	1
256	35	1
257	35	1
258	36	1
259	36	1
260	36	1
261	37	1
262	37	1
263	37	1
264	38	1
265	39	1
266	39	1
267	40	1
268	40	1
269	40	1
270	40	1
271	40	1
272	41	1
273	41	1
274	41	1
275	41	1
276	41	1
277	42	1
278	43	1
279	43	1
280	44	1
281	44	1
282	44	1
283	44	1
284	45	1
285	46	1
286	47	1
287	47	1
288	48	1
289	48	1
290	48	1
291	48	1
292	48	1
293	49	1
294	50	1
295	50	1
296	53	1
297	54	1
298	54	1
299	55	1
300	57	1
301	57	1
302	58	1
303	59	1
304	59	1
305	60	1
306	60	1
307	61	1
308	62	1
309	62	1
310	65	1
311	65	1
312	66	1
313	66	1
314	70	1
315	75	1
316	77	1
317	77	1
318	77	1
319	81	1
320	83	1
321	85	1
322	87	1
323	95	1
324	97	1
325	99	1
326	104	1
327	121	1
328	141	1
329	155	1
330	159	1
331	163	1
332	187	1
333	46	1.5
334	2	1.5
335	2	1.5
336	2	1.5
337	3	1.5
338	4	1.5
339	4	1.5
340	4	1.5
341	4	1.5
342	4	1.5
343	4	1.5
344	5	1.5
345	5	1.5
346	5	1.5
347	6	1.5
348	6	1.5
349	6	1.5
350	6	1.5
351	6	1.5
352	6	1.5
353	6	1.5
354	6	1.5
355	6	1.5
356	6	1.5
357	6	1.5
358	6	1.5
359	7	1.5
360	7	1.5
361	7	1.5
362	7	1.5
363	7	1.5
364	7	1.5
365	7	1.5
366	7	1.5
367	7	1.5
368	7	1.5
369	7	1.5
370	7	1.5
371	7	1.5
372	7	1.5
373	8	1.5
374	8	1.5
375	8	1.5
376	8	1.5
377	8	1.5
378	8	1.5
379	8	1.5
380	8	1.5
381	8	1.5
382	9	1.5
383	9	1.5
384	9	1.5
385	9	1.5
386	9	1.5
387	9	1.5
388	9	1.5
389	9	1.5
390	9	1.5
391	9	1.5
392	9	1.5
393	10	1.5
394	10	1.5
395	10	1.5
396	10	1.5
397	10	1.5
398	10	1.5
399	10	1.5
400	10	1.5
401	10	1.5
402	10	1.5
403	10	1.5
404	11	1.5
405	11	1.5
406	11	1.5
407	11	1.5
408	11	1.5
409	11	1.5
410	11	1.5
411	11	1.5
412	11	1.5
413	11	1.5
414	11	1.5
415	12	1.5
416	12	1.5
417	12	1.5
418	12	1.5
419	12	1.5
420	12	1.5
421	12	1.5
422	12	1.5
423	12	1.5
424	12	1.5
425	13	1.5
426	13	1.5
427	13	1.5
428	13	1.5
429	13	1.5
430	13	1.5
431	13	1.5
432	13	1.5
433	13	1.5
434	13	1.5
435	13	1.5
436	14	1.5
437	14	1.5
438	14	1.5
439	14	1.5
440	14	1.5
441	14	1.5
442	14	1.5
443	15	1.5
444	15	1.5
445	15	1.5
446	15	1.5
447	15	1.5
448	15	1.5
449	15	1.5
450	15	1.5
451	15	1.5
452	16	1.5
453	16	1.5
454	16	1.5
455	16	1.5
456	16	1.5
457	16	1.5
458	16	1.5
459	16	1.5
460	16	1.5
461	16	1.5
462	16	1.5
463	16	1.5
464	16	1.5
465	16	1.5
466	16	1.5
467	17	1.5
468	17	1.5
469	17	1.5
470	17	1.5
471	17	1.5
472	17	1.5
473	17	1.5
474	17	1.5
475	17	1.5
476	18	1.5
477	18	1.5
478	18	1.5
479	18	1.5
480	18	1.5
481	18	1.5
482	18	1.5
483	18	1.5
484	18	1.5
485	18	1.5
486	19	1.5
487	19	1.5
488	19	1.5
489	19	1.5
490	19	1.5
491	19	1.5
492	19	1.5
493	19	1.5
494	19	1.5
495	19	1.5
496	20	1.5
497	20	1.5
498	20	1.5
499	20	1.5
500	20	1.5
501	20	1.5
502	20	1.5
503	20	1.5
504	20	1.5
505	20	1.5
506	20	1.5
507	20	1.5
508	21	1.5
509	21	1.5
510	21	1.5
511	21	1.5
512	21	1.5
513	21	1.5
514	21	1.5
515	21	1.5
516	21	1.5
517	21	1.5
518	21	1.5
519	21	1.5
520	21	1.5
521	22	1.5
522	22	1.5
523	22	1.5
524	22	1.5
525	22	1.5
526	22	1.5
527	22	1.5
528	22	1.5
529	23	1.5
530	23	1.5
531	23	1.5
532	23	1.5
533	23	1.5
534	24	1.5
535	24	1.5
536	24	1.5
537	24	1.5
538	24	1.5
539	25	1.5
540	25	1.5
541	25	1.5
542	25	1.5
543	25	1.5
544	26	1.5
545	26	1.5
546	26	1.5
547	26	1.5
548	26	1.5
549	26	1.5
550	26	1.5
551	26	1.5
552	26	1.5
553	26	1.5
554	27	1.5
555	27	1.5
556	27	1.5
557	27	1.5
558	27	1.5
559	27	1.5
560	27	1.5
561	28	1.5
562	28	1.5
563	28	1.5
564	28	1.5
565	28	1.5
566	28	1.5
567	28	1.5
568	28	1.5
569	29	1.5
570	29	1.5
571	29	1.5
572	29	1.5
573	29	1.5
574	30	1.5
575	30	1.5
576	30	1.5
577	30	1.5
578	30	1.5
579	30	1.5
580	30	1.5
581	30	1.5
582	30	1.5
583	30	1.5
584	31	1.5
585	31	1.5
586	31	1.5
587	31	1.5
588	31	1.5
589	31	1.5
590	31	1.5
591	32	1.5
592	32	1.5
593	32	1.5
594	32	1.5
595	32	1.5
596	33	1.5
597	33	1.5
598	33	1.5
599	33	1.5
600	35	1.5
601	35	1.5
602	36	1.5
603	36	1.5
604	36	1.5
605	36	1.5
606	36	1.5
607	36	1.5
608	37	1.5
609	37	1.5
610	37	1.5
611	37	1.5
612	37	1.5
613	39	1.5
614	40	1.5
615	41	1.5
616	42	1.5
617	42	1.5
618	42	1.5
619	42	1.5
620	42	1.5
621	42	1.5
622	42	1.5
623	42	1.5
624	43	1.5
625	43	1.5
626	43	1.5
627	43	1.5
628	44	1.5
629	44	1.5
630	44	1.5
631	44	1.5
632	45	1.5
633	45	1.5
634	45	1.5
635	46	1.5
636	46	1.5
637	46	1.5
638	46	1.5
639	46	1.5
640	47	1.5
641	47	1.5
642	48	1.5
643	48	1.5
644	48	1.5
645	49	1.5
646	49	1.5
647	50	1.5
648	50	1.5
649	50	1.5
650	50	1.5
651	51	1.5
652	51	1.5
653	52	1.5
654	53	1.5
655	53	1.5
656	53	1.5
657	55	1.5
658	57	1.5
659	58	1.5
660	59	1.5
661	60	1.5
662	64	1.5
663	64	1.5
664	66	1.5
665	70	1.5
666	71	1.5
667	72	1.5
668	75	1.5
669	76	1.5
670	78	1.5
671	80	1.5
672	80	1.5
673	82	1.5
674	83	1.5
675	85	1.5
676	88	1.5
677	90	1.5
678	90	1.5
679	95	1.5
680	100	1.5
681	105	1.5
682	108	1.5
683	109	1.5
684	111	1.5
685	128	1.5
686	138	1.5
687	146	1.5
688	157	1.5
689	164	1.5
690	172	1.5
691	310	1.5
692	755	1.5
693	2	2
694	2	2
695	3	2
696	3	2
697	3	2
698	3	2
699	4	2
700	4	2
701	4	2
702	4	2
703	4	2
704	4	2
705	4	2
706	4	2
707	4	2
708	5	2
709	5	2
710	5	2
711	5	2
712	5	2
713	5	2
714	5	2
715	5	2
716	5	2
717	5	2
718	5	2
719	5	2
720	5	2
721	5	2
722	5	2
723	5	2
724	5	2
725	5	2
726	5	2
727	5	2
728	5	2
729	6	2
730	6	2
731	6	2
732	6	2
733	6	2
734	6	2
735	6	2
736	6	2
737	6	2
738	6	2
739	7	2
740	7	2
741	7	2
742	7	2
743	7	2
744	7	2
745	7	2
746	7	2
747	7	2
748	7	2
749	7	2
750	7	2
751	7	2
752	7	2
753	7	2
754	7	2
755	7	2
756	7	2
757	7	2
758	7	2
759	7	2
760	7	2
761	7	2
762	7	2
763	7	2
764	7	2
765	7	2
766	8	2
767	8	2
768	8	2
769	8	2
770	8	2
771	8	2
772	8	2
773	8	2
774	8	2
775	8	2
776	8	2
777	8	2
778	8	2
779	8	2
780	8	2
781	8	2
782	8	2
783	8	2
784	8	2
785	8	2
786	8	2
787	8	2
788	8	2
789	8	2
790	8	2
791	8	2
792	8	2
793	8	2
794	8	2
795	8	2
796	9	2
797	9	2
798	9	2
799	9	2
800	9	2
801	9	2
802	9	2
803	9	2
804	9	2
805	9	2
806	9	2
807	9	2
808	9	2
809	9	2
810	9	2
811	9	2
812	9	2
813	9	2
814	9	2
815	9	2
816	9	2
817	9	2
818	9	2
819	10	2
820	10	2
821	10	2
822	10	2
823	10	2
824	10	2
825	10	2
826	10	2
827	10	2
828	10	2
829	10	2
830	10	2
831	10	2
832	10	2
833	10	2
834	10	2
835	10	2
836	10	2
837	10	2
838	10	2
839	10	2
840	10	2
841	10	2
842	10	2
843	10	2
844	10	2
845	10	2
846	10	2
847	10	2
848	10	2
849	10	2
850	11	2
851	11	2
852	11	2
853	11	2
854	11	2
855	11	2
856	11	2
857	11	2
858	11	2
859	11	2
860	11	2
861	11	2
862	11	2
863	11	2
864	11	2
865	11	2
866	11	2
867	11	2
868	11	2
869	11	2
870	11	2
871	11	2
872	11	2
873	11	2
874	11	2
875	11	2
876	12	2
877	12	2
878	12	2
879	12	2
880	12	2
881	12	2
882	12	2
883	12	2
884	12	2
885	12	2
886	12	2
887	12	2
888	12	2
889	12	2
890	12	2
891	12	2
892	12	2
893	12	2
894	12	2
895	12	2
896	12	2
897	12	2
898	12	2
899	12	2
900	12	2
901	12	2
902	12	2
903	13	2
904	13	2
905	13	2
906	13	2
907	13	2
908	13	2
909	13	2
910	13	2
911	13	2
912	13	2
913	13	2
914	13	2
915	13	2
916	13	2
917	13	2
918	13	2
919	13	2
920	13	2
921	13	2
922	13	2
923	13	2
924	13	2
925	13	2
926	13	2
927	13	2
928	13	2
929	13	2
930	13	2
931	13	2
932	13	2
933	13	2
934	13	2
935	13	2
936	13	2
937	13	2
938	14	2
939	14	2
940	14	2
941	14	2
942	14	2
943	14	2
944	14	2
945	14	2
946	14	2
947	14	2
948	14	2
949	14	2
950	14	2
951	14	2
952	14	2
953	14	2
954	14	2
955	14	2
956	14	2
957	15	2
958	15	2
959	15	2
960	15	2
961	15	2
962	15	2
963	15	2
964	15	2
965	15	2
966	15	2
967	15	2
968	15	2
969	15	2
970	15	2
971	15	2
972	15	2
973	15	2
974	15	2
975	15	2
976	16	2
977	16	2
978	16	2
979	16	2
980	16	2
981	16	2
982	16	2
983	16	2
984	16	2
985	16	2
986	16	2
987	16	2
988	16	2
989	16	2
990	16	2
991	16	2
992	16	2
993	16	2
994	17	2
995	17	2
996	17	2
997	17	2
998	17	2
999	17	2
1000	17	2
1001	17	2
1002	17	2
1003	17	2
1004	17	2
1005	17	2
1006	17	2
1007	17	2
1008	17	2
1009	17	2
1010	17	2
1011	17	2
1012	17	2
1013	17	2
1014	17	2
1015	17	2
1016	17	2
1017	17	2
1018	18	2
1019	18	2
1020	18	2
1021	18	2
1022	18	2
1023	18	2
1024	18	2
1025	18	2
1026	18	2
1027	18	2
1028	18	2
1029	18	2
1030	18	2
1031	18	2
1032	18	2
1033	18	2
1034	18	2
1035	18	2
1036	19	2
1037	19	2
1038	19	2
1039	19	2
1040	19	2
1041	19	2
1042	19	2
1043	19	2
1044	19	2
1045	19	2
1046	19	2
1047	19	2
1048	19	2
1049	19	2
1050	19	2
1051	19	2
1052	19	2
1053	19	2
1054	19	2
1055	19	2
1056	19	2
1057	19	2
1058	19	2
1059	19	2
1060	19	2
1061	19	2
1062	20	2
1063	20	2
1064	20	2
1065	20	2
1066	20	2
1067	20	2
1068	20	2
1069	20	2
1070	20	2
1071	20	2
1072	20	2
1073	20	2
1074	20	2
1075	20	2
1076	20	2
1077	20	2
1078	20	2
1079	20	2
1080	20	2
1081	20	2
1082	20	2
1083	20	2
1084	20	2
1085	21	2
1086	21	2
1087	21	2
1088	21	2
1089	21	2
1090	21	2
1091	21	2
1092	21	2
1093	21	2
1094	21	2
1095	21	2
1096	21	2
1097	21	2
1098	21	2
1099	21	2
1100	21	2
1101	21	2
1102	21	2
1103	21	2
1104	21	2
1105	21	2
1106	22	2
1107	22	2
1108	22	2
1109	22	2
1110	22	2
1111	22	2
1112	22	2
1113	22	2
1114	22	2
1115	22	2
1116	22	2
1117	22	2
1118	22	2
1119	22	2
1120	22	2
1121	22	2
1122	22	2
1123	22	2
1124	22	2
1125	22	2
1126	23	2
1127	23	2
1128	23	2
1129	23	2
1130	23	2
1131	23	2
1132	23	2
1133	23	2
1134	23	2
1135	23	2
1136	23	2
1137	23	2
1138	23	2
1139	23	2
1140	24	2
1141	24	2
1142	24	2
1143	24	2
1144	24	2
1145	24	2
1146	24	2
1147	24	2
1148	24	2
1149	24	2
1150	24	2
1151	24	2
1152	24	2
1153	24	2
1154	24	2
1155	24	2
1156	24	2
1157	24	2
1158	24	2
1159	24	2
1160	24	2
1161	24	2
1162	24	2
1163	24	2
1164	25	2
1165	25	2
1166	25	2
1167	25	2
1168	25	2
1169	25	2
1170	25	2
1171	25	2
1172	25	2
1173	25	2
1174	25	2
1175	25	2
1176	26	2
1177	26	2
1178	26	2
1179	26	2
1180	26	2
1181	26	2
1182	26	2
1183	26	2
1184	26	2
1185	26	2
1186	26	2
1187	26	2
1188	26	2
1189	26	2
1190	26	2
1191	26	2
1192	27	2
1193	27	2
1194	27	2
1195	27	2
1196	27	2
1197	27	2
1198	27	2
1199	27	2
1200	27	2
1201	27	2
1202	27	2
1203	27	2
1204	27	2
1205	27	2
1206	27	2
1207	27	2
1208	27	2
1209	28	2
1210	28	2
1211	28	2
1212	28	2
1213	28	2
1214	28	2
1215	28	2
1216	28	2
1217	28	2
1218	28	2
1219	28	2
1220	28	2
1221	28	2
1222	28	2
1223	28	2
1224	28	2
1225	29	2
1226	29	2
1227	29	2
1228	29	2
1229	29	2
1230	29	2
1231	29	2
1232	29	2
1233	29	2
1234	29	2
1235	29	2
1236	29	2
1237	29	2
1238	29	2
1239	29	2
1240	29	2
1241	30	2
1242	30	2
1243	30	2
1244	30	2
1245	30	2
1246	30	2
1247	30	2
1248	30	2
1249	30	2
1250	30	2
1251	30	2
1252	30	2
1253	30	2
1254	30	2
1255	30	2
1256	30	2
1257	30	2
1258	31	2
1259	31	2
1260	31	2
1261	31	2
1262	31	2
1263	31	2
1264	31	2
1265	32	2
1266	32	2
1267	32	2
1268	32	2
1269	32	2
1270	32	2
1271	32	2
1272	32	2
1273	32	2
1274	32	2
1275	32	2
1276	32	2
1277	32	2
1278	32	2
1279	32	2
1280	33	2
1281	33	2
1282	33	2
1283	33	2
1284	33	2
1285	33	2
1286	33	2
1287	33	2
1288	33	2
1289	33	2
1290	34	2
1291	34	2
1292	34	2
1293	34	2
1294	34	2
1295	34	2
1296	34	2
1297	35	2
1298	35	2
1299	35	2
1300	35	2
1301	35	2
1302	35	2
1303	35	2
1304	36	2
1305	36	2
1306	36	2
1307	36	2
1308	36	2
1309	36	2
1310	36	2
1311	36	2
1312	36	2
1313	37	2
1314	37	2
1315	37	2
1316	37	2
1317	37	2
1318	37	2
1319	37	2
1320	37	2
1321	37	2
1322	37	2
1323	37	2
1324	38	2
1325	38	2
1326	38	2
1327	38	2
1328	38	2
1329	38	2
1330	38	2
1331	38	2
1332	38	2
1333	38	2
1334	39	2
1335	39	2
1336	39	2
1337	39	2
1338	40	2
1339	40	2
1340	40	2
1341	40	2
1342	40	2
1343	40	2
1344	40	2
1345	40	2
1346	40	2
1347	40	2
1348	41	2
1349	41	2
1350	41	2
1351	41	2
1352	42	2
1353	42	2
1354	42	2
1355	42	2
1356	42	2
1357	42	2
1358	42	2
1359	42	2
1360	42	2
1361	43	2
1362	43	2
1363	43	2
1364	43	2
1365	43	2
1366	43	2
1367	43	2
1368	43	2
1369	43	2
1370	43	2
1371	44	2
1372	44	2
1373	44	2
1374	44	2
1375	44	2
1376	44	2
1377	44	2
1378	45	2
1379	45	2
1380	45	2
1381	45	2
1382	46	2
1383	46	2
1384	46	2
1385	46	2
1386	46	2
1387	46	2
1388	46	2
1389	47	2
1390	47	2
1391	47	2
1392	47	2
1393	47	2
1394	47	2
1395	48	2
1396	48	2
1397	48	2
1398	48	2
1399	48	2
1400	48	2
1401	48	2
1402	48	2
1403	48	2
1404	49	2
1405	49	2
1406	49	2
1407	50	2
1408	50	2
1409	50	2
1410	50	2
1411	50	2
1412	50	2
1413	51	2
1414	52	2
1415	52	2
1416	52	2
1417	52	2
1418	52	2
1419	52	2
1420	52	2
1421	53	2
1422	53	2
1423	53	2
1424	53	2
1425	54	2
1426	54	2
1427	54	2
1428	54	2
1429	55	2
1430	55	2
1431	55	2
1432	55	2
1433	55	2
1434	56	2
1435	56	2
1436	56	2
1437	56	2
1438	56	2
1439	57	2
1440	57	2
1441	57	2
1442	57	2
1443	58	2
1444	58	2
1445	58	2
1446	59	2
1447	59	2
1448	59	2
1449	60	2
1450	60	2
1451	60	2
1452	60	2
1453	60	2
1454	60	2
1455	60	2
1456	60	2
1457	61	2
1458	61	2
1459	62	2
1460	62	2
1461	62	2
1462	62	2
1463	63	2
1464	63	2
1465	63	2
1466	64	2
1467	64	2
1468	64	2
1469	64	2
1470	64	2
1471	65	2
1472	66	2
1473	66	2
1474	67	2
1475	67	2
1476	68	2
1477	68	2
1478	68	2
1479	69	2
1480	69	2
1481	70	2
1482	71	2
1483	71	2
1484	71	2
1485	73	2
1486	73	2
1487	73	2
1488	74	2
1489	74	2
1490	74	2
1491	75	2
1492	76	2
1493	77	2
1494	77	2
1495	77	2
1496	78	2
1497	78	2
1498	79	2
1499	79	2
1500	80	2
1501	80	2
1502	81	2
1503	81	2
1504	81	2
1505	83	2
1506	84	2
1507	84	2
1508	84	2
1509	84	2
1510	85	2
1511	85	2
1512	87	2
1513	88	2
1514	88	2
1515	88	2
1516	88	2
1517	88	2
1518	89	2
1519	89	2
1520	90	2
1521	92	2
1522	93	2
1523	95	2
1524	96	2
1525	98	2
1526	101	2
1527	103	2
1528	104	2
1529	108	2
1530	109	2
1531	110	2
1532	112	2
1533	113	2
1534	115	2
1535	115	2
1536	116	2
1537	118	2
1538	119	2
1539	122	2
1540	132	2
1541	133	2
1542	133	2
1543	138	2
1544	139	2
1545	140	2
1546	150	2
1547	150	2
1548	157	2
1549	160	2
1550	164	2
1551	187	2
1552	210	2
1553	212	2
1554	222	2
1555	245	2
1556	272	2
1557	273	2
1558	320	2
1559	2	2.5
1560	2	2.5
1561	3	2.5
1562	3	2.5
1563	4	2.5
1564	4	2.5
1565	4	2.5
1566	5	2.5
1567	5	2.5
1568	5	2.5
1569	5	2.5
1570	5	2.5
1571	5	2.5
1572	6	2.5
1573	6	2.5
1574	6	2.5
1575	6	2.5
1576	6	2.5
1577	6	2.5
1578	6	2.5
1579	7	2.5
1580	7	2.5
1581	7	2.5
1582	7	2.5
1583	7	2.5
1584	7	2.5
1585	7	2.5
1586	7	2.5
1587	8	2.5
1588	8	2.5
1589	8	2.5
1590	8	2.5
1591	8	2.5
1592	8	2.5
1593	8	2.5
1594	8	2.5
1595	8	2.5
1596	8	2.5
1597	8	2.5
1598	8	2.5
1599	8	2.5
1600	8	2.5
1601	8	2.5
1602	8	2.5
1603	9	2.5
1604	9	2.5
1605	9	2.5
1606	9	2.5
1607	9	2.5
1608	9	2.5
1609	9	2.5
1610	9	2.5
1611	9	2.5
1612	10	2.5
1613	10	2.5
1614	10	2.5
1615	10	2.5
1616	10	2.5
1617	10	2.5
1618	10	2.5
1619	10	2.5
1620	11	2.5
1621	11	2.5
1622	11	2.5
1623	11	2.5
1624	11	2.5
1625	11	2.5
1626	11	2.5
1627	11	2.5
1628	11	2.5
1629	11	2.5
1630	11	2.5
1631	12	2.5
1632	12	2.5
1633	12	2.5
1634	12	2.5
1635	12	2.5
1636	12	2.5
1637	12	2.5
1638	12	2.5
1639	12	2.5
1640	12	2.5
1641	12	2.5
1642	13	2.5
1643	13	2.5
1644	13	2.5
1645	13	2.5
1646	13	2.5
1647	13	2.5
1648	13	2.5
1649	13	2.5
1650	13	2.5
1651	13	2.5
1652	14	2.5
1653	14	2.5
1654	14	2.5
1655	14	2.5
1656	14	2.5
1657	14	2.5
1658	14	2.5
1659	14	2.5
1660	14	2.5
1661	14	2.5
1662	14	2.5
1663	15	2.5
1664	15	2.5
1665	15	2.5
1666	15	2.5
1667	15	2.5
1668	15	2.5
1669	15	2.5
1670	15	2.5
1671	15	2.5
1672	15	2.5
1673	15	2.5
1674	15	2.5
1675	15	2.5
1676	15	2.5
1677	16	2.5
1678	16	2.5
1679	16	2.5
1680	16	2.5
1681	16	2.5
1682	16	2.5
1683	16	2.5
1684	16	2.5
1685	17	2.5
1686	17	2.5
1687	17	2.5
1688	17	2.5
1689	17	2.5
1690	17	2.5
1691	17	2.5
1692	17	2.5
1693	17	2.5
1694	17	2.5
1695	17	2.5
1696	17	2.5
1697	17	2.5
1698	18	2.5
1699	18	2.5
1700	18	2.5
1701	18	2.5
1702	18	2.5
1703	18	2.5
1704	18	2.5
1705	18	2.5
1706	18	2.5
1707	18	2.5
1708	19	2.5
1709	19	2.5
1710	19	2.5
1711	19	2.5
1712	19	2.5
1713	19	2.5
1714	19	2.5
1715	19	2.5
1716	19	2.5
1717	19	2.5
1718	19	2.5
1719	20	2.5
1720	20	2.5
1721	20	2.5
1722	20	2.5
1723	20	2.5
1724	20	2.5
1725	20	2.5
1726	20	2.5
1727	20	2.5
1728	21	2.5
1729	21	2.5
1730	21	2.5
1731	21	2.5
1732	21	2.5
1733	21	2.5
1734	21	2.5
1735	21	2.5
1736	22	2.5
1737	22	2.5
1738	22	2.5
1739	22	2.5
1740	22	2.5
1741	22	2.5
1742	22	2.5
1743	22	2.5
1744	22	2.5
1745	22	2.5
1746	23	2.5
1747	23	2.5
1748	23	2.5
1749	23	2.5
1750	23	2.5
1751	23	2.5
1752	23	2.5
1753	23	2.5
1754	24	2.5
1755	25	2.5
1756	25	2.5
1757	25	2.5
1758	25	2.5
1759	25	2.5
1760	25	2.5
1761	26	2.5
1762	26	2.5
1763	26	2.5
1764	26	2.5
1765	26	2.5
1766	27	2.5
1767	27	2.5
1768	27	2.5
1769	27	2.5
1770	27	2.5
1771	27	2.5
1772	27	2.5
1773	27	2.5
1774	27	2.5
1775	27	2.5
1776	28	2.5
1777	28	2.5
1778	28	2.5
1779	28	2.5
1780	28	2.5
1781	29	2.5
1782	29	2.5
1783	29	2.5
1784	29	2.5
1785	30	2.5
1786	30	2.5
1787	30	2.5
1788	30	2.5
1789	30	2.5
1790	30	2.5
1791	30	2.5
1792	30	2.5
1793	31	2.5
1794	31	2.5
1795	32	2.5
1796	32	2.5
1797	33	2.5
1798	33	2.5
1799	33	2.5
1800	33	2.5
1801	33	2.5
1802	34	2.5
1803	34	2.5
1804	34	2.5
1805	35	2.5
1806	35	2.5
1807	35	2.5
1808	36	2.5
1809	36	2.5
1810	36	2.5
1811	36	2.5
1812	36	2.5
1813	37	2.5
1814	37	2.5
1815	37	2.5
1816	38	2.5
1817	38	2.5
1818	38	2.5
1819	38	2.5
1820	38	2.5
1821	39	2.5
1822	39	2.5
1823	39	2.5
1824	40	2.5
1825	40	2.5
1826	40	2.5
1827	40	2.5
1828	40	2.5
1829	41	2.5
1830	41	2.5
1831	41	2.5
1832	42	2.5
1833	42	2.5
1834	42	2.5
1835	42	2.5
1836	42	2.5
1837	43	2.5
1838	43	2.5
1839	43	2.5
1840	43	2.5
1841	44	2.5
1842	44	2.5
1843	45	2.5
1844	45	2.5
1845	45	2.5
1846	45	2.5
1847	45	2.5
1848	46	2.5
1849	46	2.5
1850	46	2.5
1851	47	2.5
1852	48	2.5
1853	48	2.5
1854	48	2.5
1855	50	2.5
1856	50	2.5
1857	51	2.5
1858	51	2.5
1859	52	2.5
1860	52	2.5
1861	52	2.5
1862	52	2.5
1863	53	2.5
1864	53	2.5
1865	53	2.5
1866	54	2.5
1867	54	2.5
1868	54	2.5
1869	56	2.5
1870	56	2.5
1871	56	2.5
1872	56	2.5
1873	57	2.5
1874	57	2.5
1875	60	2.5
1876	60	2.5
1877	60	2.5
1878	60	2.5
1879	60	2.5
1880	61	2.5
1881	61	2.5
1882	61	2.5
1883	61	2.5
1884	62	2.5
1885	64	2.5
1886	65	2.5
1887	67	2.5
1888	67	2.5
1889	68	2.5
1890	69	2.5
1891	70	2.5
1892	73	2.5
1893	73	2.5
1894	73	2.5
1895	73	2.5
1896	73	2.5
1897	74	2.5
1898	74	2.5
1899	75	2.5
1900	75	2.5
1901	78	2.5
1902	78	2.5
1903	78	2.5
1904	81	2.5
1905	81	2.5
1906	82	2.5
1907	82	2.5
1908	82	2.5
1909	84	2.5
1910	87	2.5
1911	90	2.5
1912	90	2.5
1913	92	2.5
1914	92	2.5
1915	92	2.5
1916	93	2.5
1917	94	2.5
1918	94	2.5
1919	99	2.5
1920	100	2.5
1921	103	2.5
1922	108	2.5
1923	109	2.5
1924	109	2.5
1925	111	2.5
1926	117	2.5
1927	122	2.5
1928	124	2.5
1929	126	2.5
1930	130	2.5
1931	137	2.5
1932	148	2.5
1933	162	2.5
1934	174	2.5
1935	179	2.5
1936	194	2.5
1937	256	2.5
1938	3	3
1939	4	3
1940	4	3
1941	4	3
1942	4	3
1943	5	3
1944	5	3
1945	5	3
1946	5	3
1947	5	3
1948	5	3
1949	5	3
1950	5	3
1951	5	3
1952	6	3
1953	6	3
1954	6	3
1955	6	3
1956	6	3
1957	6	3
1958	6	3
1959	6	3
1960	6	3
1961	6	3
1962	7	3
1963	7	3
1964	7	3
1965	7	3
1966	7	3
1967	7	3
1968	7	3
1969	7	3
1970	7	3
1971	7	3
1972	7	3
1973	7	3
1974	7	3
1975	7	3
1976	7	3
1977	7	3
1978	7	3
1979	7	3
1980	7	3
1981	8	3
1982	8	3
1983	8	3
1984	8	3
1985	8	3
1986	8	3
1987	8	3
1988	8	3
1989	8	3
1990	8	3
1991	8	3
1992	8	3
1993	8	3
1994	8	3
1995	8	3
1996	8	3
1997	8	3
1998	9	3
1999	9	3
[truncated: 657 more rows]

## Sheet: Hungary 2015
fruit body	g	maturation class
1	1	1
2	1	1
3	1	1
4	1	1
5	1	1
6	1	1
7	1	1
8	1	1
9	1	1
10	2	1
11	2	1
12	2	1
13	2	1
14	2	1
15	2	1
16	2	1
17	2	1
18	2	1
19	2	1
20	2	1
21	2	1
22	2	1
23	2	1
24	2	1
25	2	1
26	2	1
27	2	1
28	2	1
29	2	1
30	2	1
31	2	1
32	2	1
33	2	1
34	2	1
35	2.2	1
36	3	1
37	3	1
38	3	1
39	3	1
40	3	1
41	3	1
42	3	1
43	3	1
44	3	1
45	3	1
46	3	1
47	3	1
48	3	1
49	3	1
50	3	1
51	3	1
52	3.4	1
53	4	1
54	4	1
55	4	1
56	4	1
57	4	1
58	4	1
59	4	1
60	4	1
61	4	1
62	4	1
63	5	1
64	5	1
65	5	1
66	5	1
67	5	1
68	5	1
69	5	1
70	5	1
71	5	1
72	5	1
73	5	1
74	5	1
75	5	1
76	6	1
77	6	1
78	6	1
79	6	1
80	6	1
81	6	1
82	6	1
83	6	1
84	6	1
85	6	1
86	6	1
87	6	1
88	7	1
89	7	1
90	7	1
91	7	1
92	7	1
93	7	1
94	7	1
95	7	1
96	7	1
97	7	1
98	7	1
99	7	1
100	7	1
101	7	1
102	8	1
103	8	1
104	8	1
105	8	1
106	8	1
107	8	1
108	8	1
109	8	1
110	8	1
111	9	1
112	9	1
113	9	1
114	9	1
115	9	1
116	9	1
117	9	1
118	9	1
119	9	1
120	10	1
121	10	1
122	10	1
123	10	1
124	10	1
125	10	1
126	10	1
127	11	1
128	11	1
129	11	1
130	11	1
131	11	1
132	11	1
133	11	1
134	12	1
135	12	1
136	12	1
137	12	1
138	12	1
139	12	1
140	12	1
141	13	1
142	13	1
143	13	1
144	13	1
145	13	1
146	13	1
147	13	1
148	14	1
149	14	1
150	14	1
151	14	1
152	14	1
153	15	1
154	15	1
155	15	1
156	15	1
157	16	1
158	16	1
159	16	1
160	16	1
161	17	1
162	17	1
163	17	1
164	17	1
165	17	1
166	17	1
167	17	1
168	17	1
169	18	1
170	18	1
171	18	1
172	18	1
173	18	1
174	18.3	1
175	19	1
176	19	1
177	19	1
178	19	1
179	19	1
180	19.8	1
181	20	1
182	20	1
183	20	1
184	21	1
185	21	1
186	22	1
187	22	1
188	23	1
189	24	1
190	24	1
191	24.5	1
192	24.5	1
193	25	1
194	25.6	1
195	26	1
196	26	1
197	26	1
198	26.8	1
199	27	1
200	27	1
201	27	1
202	28	1
203	28	1
204	28	1
205	29	1
206	29	1
207	29	1
208	29	1
209	30	1
210	32	1
211	32	1
212	33	1
213	35.2	1
214	37	1
215	38	1
216	38.5	1
217	39	1
218	39.5	1
219	41	1
220	41.5	1
221	42	1
222	43.2	1
223	45	1
224	46.8	1
225	48	1
226	50	1
227	50	1
228	54	1
229	57	1
230	60	1
231	62	1
232	72.6	1
233	73.4	1
234	83	1
235	99.1	1
236	132	1
237	1	1.5
238	1	1.5
239	1	1.5
240	1	1.5
241	1	1.5
242	1	1.5
243	1	1.5
244	1	1.5
245	1	1.5
246	1	1.5
247	1	1.5
248	1	1.5
249	1	1.5
250	1	1.5
251	1	1.5
252	1	1.5
253	1	1.5
254	1	1.5
255	1	1.5
256	1	1.5
257	1	1.5
258	1	1.5
259	1	1.5
260	1	1.5
261	1	1.5
262	1	1.5
263	1	1.5
264	1	1.5
265	1	1.5
266	1	1.5
267	1	1.5
268	1	1.5
269	1	1.5
270	1	1.5
271	1	1.5
272	1	1.5
273	1	1.5
274	1	1.5
275	1	1.5
276	1	1.5
277	1	1.5
278	1	1.5
279	1	1.5
280	1	1.5
281	1	1.5
282	1	1.5
283	1.3	1.5
284	1.5	1.5
285	1.6	1.5
286	2	1.5
287	2	1.5
288	2	1.5
289	2	1.5
290	2	1.5
291	2	1.5
292	2	1.5
293	2	1.5
294	2	1.5
295	2	1.5
296	2	1.5
297	2	1.5
298	2	1.5
299	2	1.5
300	2	1.5
301	2	1.5
302	2	1.5
303	2	1.5
304	2	1.5
305	2	1.5
306	2	1.5
307	2	1.5
308	2	1.5
309	2	1.5
310	2	1.5
311	2	1.5
312	2	1.5
313	2	1.5
314	2	1.5
315	2	1.5
316	2	1.5
317	2	1.5
318	2	1.5
319	2	1.5
320	2	1.5
321	2	1.5
322	2	1.5
323	2	1.5
324	2	1.5
325	2	1.5
326	2	1.5
327	2	1.5
328	2	1.5
329	2	1.5
330	2	1.5
331	2	1.5
332	2	1.5
333	2	1.5
334	2	1.5
335	2	1.5
336	2	1.5
337	2	1.5
338	2	1.5
339	2	1.5
340	2	1.5
341	2	1.5
342	2	1.5
343	2	1.5
344	2	1.5
345	2	1.5
346	2	1.5
347	2	1.5
348	2	1.5
349	2	1.5
350	2	1.5
351	2	1.5
352	2	1.5
353	2	1.5
354	2	1.5
355	2	1.5
356	2	1.5
357	2	1.5
358	2	1.5
359	2	1.5
360	2	1.5
361	2	1.5
362	2.1	1.5
363	2.8	1.5
364	3	1.5
365	3	1.5
366	3	1.5
367	3	1.5
368	3	1.5
369	3	1.5
370	3	1.5
371	3	1.5
372	3	1.5
373	3	1.5
374	3	1.5
375	3	1.5
376	3	1.5
377	3	1.5
378	3	1.5
379	3	1.5
380	3	1.5
381	3	1.5
382	3	1.5
383	3	1.5
384	3	1.5
385	3	1.5
386	3	1.5
387	3	1.5
388	3	1.5
389	3	1.5
390	3	1.5
391	3	1.5
392	3	1.5
393	3	1.5
394	3	1.5
395	3	1.5
396	3	1.5
397	3	1.5
398	3	1.5
399	3	1.5
400	3	1.5
401	3	1.5
402	3	1.5
403	3	1.5
404	3	1.5
405	3	1.5
406	3	1.5
407	3	1.5
408	3	1.5
409	3	1.5
410	3	1.5
411	3	1.5
412	3	1.5
413	3	1.5
414	3	1.5
415	3	1.5
416	3	1.5
417	3	1.5
418	3	1.5
419	3	1.5
420	3	1.5
421	3	1.5
422	3	1.5
423	3	1.5
424	3	1.5
425	3	1.5
426	3	1.5
427	3	1.5
428	3	1.5
429	3	1.5
430	3	1.5
431	3	1.5
432	3	1.5
433	3	1.5
434	3	1.5
435	3	1.5
436	3	1.5
437	3	1.5
438	3	1.5
439	3	1.5
440	3	1.5
441	3	1.5
442	3	1.5
443	3	1.5
444	3	1.5
445	3	1.5
446	3	1.5
447	3	1.5
448	3	1.5
449	3	1.5
450	3	1.5
451	3	1.5
452	3	1.5
453	3	1.5
454	3	1.5
455	3	1.5
456	3	1.5
457	3	1.5
458	3	1.5
459	3	1.5
460	3	1.5
461	3	1.5
462	3	1.5
463	3	1.5
464	3	1.5
465	3	1.5
466	3	1.5
467	4	1.5
468	4	1.5
469	4	1.5
470	4	1.5
471	4	1.5
472	4	1.5
473	4	1.5
474	4	1.5
475	4	1.5
476	4	1.5
477	4	1.5
478	4	1.5
479	4	1.5
480	4	1.5
481	4	1.5
482	4	1.5
483	4	1.5
484	4	1.5
485	4	1.5
486	4	1.5
487	4	1.5
488	4	1.5
489	4	1.5
490	4	1.5
491	4	1.5
492	4	1.5
493	4	1.5
494	4	1.5
495	4	1.5
496	4	1.5
497	4	1.5
498	4	1.5
499	4	1.5
500	4	1.5
501	4	1.5
502	4	1.5
503	4	1.5
504	4	1.5
505	4	1.5
506	4	1.5
507	4	1.5
508	4	1.5
509	4	1.5
510	4	1.5
511	4	1.5
512	4	1.5
513	4	1.5
514	4	1.5
515	4	1.5
516	4	1.5
517	4	1.5
518	4	1.5
519	4	1.5
520	4	1.5
521	4	1.5
522	4	1.5
523	4	1.5
524	4	1.5
525	4	1.5
526	4	1.5
527	4	1.5
528	4	1.5
529	4	1.5
530	4	1.5
531	4	1.5
532	4	1.5
533	4	1.5
534	4	1.5
535	4	1.5
536	4	1.5
537	4	1.5
538	4	1.5
539	4	1.5
540	4	1.5
541	4	1.5
542	4	1.5
543	4	1.5
544	4	1.5
545	4	1.5
546	4	1.5
547	4	1.5
548	4	1.5
549	4	1.5
550	4	1.5
551	4	1.5
552	4	1.5
553	4	1.5
554	4	1.5
555	4	1.5
556	4	1.5
557	4	1.5
558	4	1.5
559	4	1.5
560	4	1.5
561	4	1.5
562	4	1.5
563	4	1.5
564	4	1.5
565	4	1.5
566	4	1.5
567	4	1.5
568	4	1.5
569	4	1.5
570	4	1.5
571	4	1.5
572	4	1.5
573	4	1.5
574	4	1.5
575	4	1.5
576	4	1.5
577	4	1.5
578	4	1.5
579	4	1.5
580	4	1.5
581	4	1.5
582	4	1.5
583	4	1.5
584	4	1.5
585	4	1.5
586	4	1.5
587	4	1.5
588	4	1.5
589	4	1.5
590	4	1.5
591	4	1.5
592	4	1.5
593	4	1.5
594	4	1.5
595	4	1.5
596	4	1.5
597	4	1.5
598	4	1.5
599	5	1.5
600	5	1.5
601	5	1.5
602	5	1.5
603	5	1.5
604	5	1.5
605	5	1.5
606	5	1.5
607	5	1.5
608	5	1.5
609	5	1.5
610	5	1.5
611	5	1.5
612	5	1.5
613	5	1.5
614	5	1.5
615	5	1.5
616	5	1.5
617	5	1.5
618	5	1.5
619	5	1.5
620	5	1.5
621	5	1.5
622	5	1.5
623	5	1.5
624	5	1.5
625	5	1.5
626	5	1.5
627	5	1.5
628	5	1.5
629	5	1.5
630	5	1.5
631	5	1.5
632	5	1.5
633	5	1.5
634	5	1.5
635	5	1.5
636	5	1.5
637	5	1.5
638	5	1.5
639	5	1.5
640	5	1.5
641	5	1.5
642	5	1.5
643	5	1.5
644	5	1.5
645	5	1.5
646	5	1.5
647	5	1.5
648	5	1.5
649	5	1.5
650	5	1.5
651	5	1.5
652	5	1.5
653	5	1.5
654	5	1.5
655	5	1.5
656	5	1.5
657	5	1.5
658	5	1.5
659	5	1.5
660	5	1.5
661	5	1.5
662	5	1.5
663	5	1.5
664	5	1.5
665	5	1.5
666	5	1.5
667	5	1.5
668	5	1.5
669	5	1.5
670	5	1.5
671	5	1.5
672	5	1.5
673	5	1.5
674	5	1.5
675	5	1.5
676	5	1.5
677	5	1.5
678	5	1.5
679	5	1.5
680	5	1.5
681	5	1.5
682	5	1.5
683	5	1.5
684	5	1.5
685	5	1.5
686	5	1.5
687	5	1.5
688	5	1.5
689	5	1.5
690	5	1.5
691	5	1.5
692	5	1.5
693	5	1.5
694	5	1.5
695	5	1.5
696	5	1.5
697	5	1.5
698	5	1.5
699	5	1.5
700	5	1.5
701	5	1.5
702	5	1.5
703	5	1.5
704	5	1.5
705	5	1.5
706	5	1.5
707	5	1.5
708	5	1.5
709	5	1.5
710	5	1.5
711	5	1.5
712	5	1.5
713	5	1.5
714	5.4	1.5
715	5.5	1.5
716	6	1.5
717	6	1.5
718	6	1.5
719	6	1.5
720	6	1.5
721	6	1.5
722	6	1.5
723	6	1.5
724	6	1.5
725	6	1.5
726	6	1.5
727	6	1.5
728	6	1.5
729	6	1.5
730	6	1.5
731	6	1.5
732	6	1.5
733	6	1.5
734	6	1.5
735	6	1.5
736	6	1.5
737	6	1.5
738	6	1.5
739	6	1.5
740	6	1.5
741	6	1.5
742	6	1.5
743	6	1.5
744	6	1.5
745	6	1.5
746	6	1.5
747	6	1.5
748	6	1.5
749	6	1.5
750	6	1.5
751	6	1.5
752	6	1.5
753	6	1.5
754	6	1.5
755	6	1.5
756	6	1.5
757	6	1.5
758	6	1.5
759	6	1.5
760	6	1.5
761	6	1.5
762	6	1.5
763	6	1.5
764	6	1.5
765	6	1.5
766	6	1.5
767	6	1.5
768	6	1.5
769	6	1.5
770	6	1.5
771	6	1.5
772	6	1.5
773	6	1.5
774	6	1.5
775	6	1.5
776	6	1.5
777	6	1.5
778	6	1.5
779	6	1.5
780	6	1.5
781	6	1.5
782	6	1.5
783	6	1.5
784	6	1.5
785	6	1.5
786	6	1.5
787	6	1.5
788	6	1.5
789	6	1.5
790	6	1.5
791	6	1.5
792	6	1.5
793	6	1.5
794	6	1.5
795	6	1.5
796	6	1.5
797	6	1.5
798	6	1.5
799	6	1.5
800	6	1.5
801	6	1.5
802	6	1.5
803	6	1.5
804	6	1.5
805	6	1.5
806	6	1.5
807	6	1.5
808	6	1.5
809	6	1.5
810	6	1.5
811	6	1.5
812	6	1.5
813	6	1.5
814	6	1.5
815	6	1.5
816	6	1.5
817	6	1.5
818	6	1.5
819	6	1.5
820	6	1.5
821	6	1.5
822	6	1.5
823	6	1.5
824	6	1.5
825	6	1.5
826	6	1.5
827	6	1.5
828	6	1.5
829	6	1.5
830	6	1.5
831	6	1.5
832	6	1.5
833	6	1.5
834	6	1.5
835	6	1.5
836	6	1.5
837	6	1.5
838	6	1.5
839	6	1.5
840	6	1.5
841	6	1.5
842	6	1.5
843	6	1.5
844	6	1.5
845	6	1.5
846	6	1.5
847	6	1.5
848	6	1.5
849	6	1.5
850	6	1.5
851	6	1.5
852	6	1.5
853	6	1.5
854	7	1.5
855	7	1.5
856	7	1.5
857	7	1.5
858	7	1.5
859	7	1.5
860	7	1.5
861	7	1.5
862	7	1.5
863	7	1.5
864	7	1.5
865	7	1.5
866	7	1.5
867	7	1.5
868	7	1.5
869	7	1.5
870	7	1.5
871	7	1.5
872	7	1.5
873	7	1.5
874	7	1.5
875	7	1.5
876	7	1.5
877	7	1.5
878	7	1.5
879	7	1.5
880	7	1.5
881	7	1.5
882	7	1.5
883	7	1.5
884	7	1.5
885	7	1.5
886	7	1.5
887	7	1.5
888	7	1.5
889	7	1.5
890	7	1.5
891	7	1.5
892	7	1.5
893	7	1.5
894	7	1.5
895	7	1.5
896	7	1.5
897	7	1.5
898	7	1.5
899	7	1.5
900	7	1.5
901	7	1.5
902	7	1.5
903	7	1.5
904	7	1.5
905	7	1.5
906	7	1.5
907	7	1.5
908	7	1.5
909	7	1.5
910	7	1.5
911	7	1.5
912	7	1.5
913	7	1.5
914	7	1.5
915	7	1.5
916	7	1.5
917	7	1.5
918	7	1.5
919	7	1.5
920	7	1.5
921	7	1.5
922	7	1.5
923	7	1.5
924	7	1.5
925	7	1.5
926	7	1.5
927	7	1.5
928	7	1.5
929	7	1.5
930	7	1.5
931	7	1.5
932	7	1.5
933	7	1.5
934	7	1.5
935	7	1.5
936	7	1.5
937	7	1.5
938	7	1.5
939	7	1.5
940	7	1.5
941	7	1.5
942	7	1.5
943	7	1.5
944	7	1.5
945	7	1.5
946	7	1.5
947	7	1.5
948	7	1.5
949	7	1.5
950	7	1.5
951	7	1.5
952	7	1.5
953	7	1.5
954	7	1.5
955	7	1.5
956	7	1.5
957	7	1.5
958	7	1.5
959	7	1.5
960	7	1.5
961	7	1.5
962	7	1.5
963	7	1.5
964	7	1.5
965	7	1.5
966	7	1.5
967	7	1.5
968	7	1.5
969	7	1.5
970	7	1.5
971	7	1.5
972	7	1.5
973	7	1.5
974	7	1.5
975	7	1.5
976	7	1.5
977	7	1.5
978	7	1.5
979	7	1.5
980	7	1.5
981	7	1.5
982	7	1.5
983	7	1.5
984	7	1.5
985	7	1.5
986	7	1.5
987	7	1.5
988	7	1.5
989	7	1.5
990	7	1.5
991	7	1.5
992	7	1.5
993	7	1.5
994	7	1.5
995	7	1.5
996	7.5	1.5
997	7.5	1.5
998	8	1.5
999	8	1.5
1000	8	1.5
1001	8	1.5
1002	8	1.5
1003	8	1.5
1004	8	1.5
1005	8	1.5
1006	8	1.5
1007	8	1.5
1008	8	1.5
1009	8	1.5
1010	8	1.5
1011	8	1.5
1012	8	1.5
1013	8	1.5
1014	8	1.5
1015	8	1.5
1016	8	1.5
1017	8	1.5
1018	8	1.5
1019	8	1.5
1020	8	1.5
1021	8	1.5
1022	8	1.5
1023	8	1.5
1024	8	1.5
1025	8	1.5
1026	8	1.5
1027	8	1.5
1028	8	1.5
1029	8	1.5
1030	8	1.5
1031	8	1.5
1032	8	1.5
1033	8	1.5
1034	8	1.5
1035	8	1.5
1036	8	1.5
1037	8	1.5
1038	8	1.5
1039	8	1.5
1040	8	1.5
1041	8	1.5
1042	8	1.5
1043	8	1.5
1044	8	1.5
1045	8	1.5
1046	8	1.5
1047	8	1.5
1048	8	1.5
1049	8	1.5
1050	8	1.5
1051	8	1.5
1052	8	1.5
1053	8	1.5
1054	8	1.5
1055	8	1.5
1056	8	1.5
1057	8	1.5
1058	8	1.5
1059	8	1.5
1060	8	1.5
1061	8	1.5
1062	8	1.5
1063	8	1.5
1064	8	1.5
1065	8	1.5
1066	8	1.5
1067	8	1.5
1068	8	1.5
1069	8	1.5
1070	8	1.5
1071	8	1.5
1072	8	1.5
1073	8	1.5
1074	8	1.5
1075	8	1.5
1076	8	1.5
1077	8	1.5
1078	8	1.5
1079	8	1.5
1080	8	1.5
1081	8	1.5
1082	8	1.5
1083	8	1.5
1084	8	1.5
1085	8	1.5
1086	8	1.5
1087	8	1.5
1088	8	1.5
1089	8	1.5
1090	8	1.5
1091	8	1.5
1092	8	1.5
1093	8	1.5
1094	8	1.5
1095	8	1.5
1096	8	1.5
1097	8	1.5
1098	8	1.5
1099	8	1.5
1100	8	1.5
1101	8	1.5
1102	8	1.5
1103	8	1.5
1104	8	1.5
1105	8	1.5
1106	8	1.5
1107	8	1.5
1108	8	1.5
1109	8	1.5
1110	8	1.5
1111	8	1.5
1112	8	1.5
1113	8	1.5
1114	8	1.5
1115	8	1.5
1116	8	1.5
1117	8	1.5
1118	8	1.5
1119	8	1.5
1120	8	1.5
1121	8	1.5
1122	8	1.5
1123	8	1.5
1124	8	1.5
1125	8	1.5
1126	8	1.5
1127	8	1.5
1128	8	1.5
1129	8	1.5
1130	8	1.5
1131	9	1.5
1132	9	1.5
1133	9	1.5
1134	9	1.5
1135	9	1.5
1136	9	1.5
1137	9	1.5
1138	9	1.5
1139	9	1.5
1140	9	1.5
1141	9	1.5
1142	9	1.5
1143	9	1.5
1144	9	1.5
1145	9	1.5
1146	9	1.5
1147	9	1.5
1148	9	1.5
1149	9	1.5
1150	9	1.5
1151	9	1.5
1152	9	1.5
1153	9	1.5
1154	9	1.5
1155	9	1.5
1156	9	1.5
1157	9	1.5
1158	9	1.5
1159	9	1.5
1160	9	1.5
1161	9	1.5
1162	9	1.5
1163	9	1.5
1164	9	1.5
1165	9	1.5
1166	9	1.5
1167	9	1.5
1168	9	1.5
1169	9	1.5
1170	9	1.5
1171	9	1.5
1172	9	1.5
1173	9	1.5
1174	9	1.5
1175	9	1.5
1176	9	1.5
1177	9	1.5
1178	9	1.5
1179	9	1.5
1180	9	1.5
1181	9	1.5
1182	9	1.5
1183	9	1.5
1184	9	1.5
1185	9	1.5
1186	9	1.5
1187	9	1.5
1188	9	1.5
1189	9	1.5
1190	9	1.5
1191	9	1.5
1192	9	1.5
1193	9	1.5
1194	9	1.5
1195	9	1.5
1196	9	1.5
1197	9	1.5
1198	9	1.5
1199	9	1.5
1200	9	1.5
1201	9	1.5
1202	9	1.5
1203	9	1.5
1204	9	1.5
1205	9	1.5
1206	9	1.5
1207	9	1.5
1208	9	1.5
1209	9	1.5
1210	9	1.5
1211	9	1.5
1212	9	1.5
1213	9	1.5
1214	9	1.5
1215	9	1.5
1216	9	1.5
1217	9	1.5
1218	9	1.5
1219	9	1.5
1220	9	1.5
1221	9	1.5
1222	9	1.5
1223	9	1.5
1224	9	1.5
1225	9	1.5
1226	9	1.5
1227	9	1.5
1228	9	1.5
1229	9.9	1.5
1230	10	1.5
1231	10	1.5
1232	10	1.5
1233	10	1.5
1234	10	1.5
1235	10	1.5
1236	10	1.5
1237	10	1.5
1238	10	1.5
1239	10	1.5
1240	10	1.5
1241	10	1.5
1242	10	1.5
1243	10	1.5
1244	10	1.5
1245	10	1.5
1246	10	1.5
1247	10	1.5
1248	10	1.5
1249	10	1.5
1250	10	1.5
1251	10	1.5
1252	10	1.5
1253	10	1.5
1254	10	1.5
1255	10	1.5
1256	10	1.5
1257	10	1.5
1258	10	1.5
1259	10	1.5
1260	10	1.5
1261	10	1.5
1262	10	1.5
1263	10	1.5
1264	10	1.5
1265	10	1.5
1266	10	1.5
1267	10	1.5
1268	10	1.5
1269	10	1.5
1270	10	1.5
1271	10	1.5
1272	10	1.5
1273	10	1.5
1274	10	1.5
1275	10	1.5
1276	10	1.5
1277	10	1.5
1278	10	1.5
1279	10	1.5
1280	10	1.5
1281	10	1.5
1282	10	1.5
1283	10	1.5
1284	10	1.5
1285	10	1.5
1286	10	1.5
1287	10	1.5
1288	10	1.5
1289	10	1.5
1290	10	1.5
1291	10	1.5
1292	10	1.5
1293	10	1.5
1294	10	1.5
1295	10	1.5
1296	10	1.5
1297	10	1.5
1298	10	1.5
1299	10	1.5
1300	10	1.5
1301	10	1.5
1302	10	1.5
1303	10	1.5
1304	10	1.5
1305	10	1.5
1306	10	1.5
1307	10	1.5
1308	10	1.5
1309	10	1.5
1310	10	1.5
1311	10	1.5
1312	10	1.5
1313	10	1.5
1314	10	1.5
1315	10	1.5
1316	10	1.5
1317	10	1.5
1318	10	1.5
1319	10	1.5
1320	10	1.5
1321	10	1.5
1322	10	1.5
1323	10	1.5
1324	10	1.5
1325	10	1.5
1326	10	1.5
1327	10	1.5
1328	10	1.5
1329	10	1.5
1330	10	1.5
1331	10	1.5
1332	10	1.5
1333	10	1.5
1334	10	1.5
1335	10	1.5
1336	10	1.5
1337	10	1.5
1338	11	1.5
1339	11	1.5
1340	11	1.5
1341	11	1.5
1342	11	1.5
1343	11	1.5
1344	11	1.5
1345	11	1.5
1346	11	1.5
1347	11	1.5
1348	11	1.5
1349	11	1.5
1350	11	1.5
1351	11	1.5
1352	11	1.5
1353	11	1.5
1354	11	1.5
1355	11	1.5
1356	11	1.5
1357	11	1.5
1358	11	1.5
1359	11	1.5
1360	11	1.5
1361	11	1.5
1362	11	1.5
1363	11	1.5
1364	11	1.5
1365	11	1.5
1366	11	1.5
1367	11	1.5
1368	11	1.5
1369	11	1.5
1370	11	1.5
1371	11	1.5
1372	11	1.5
1373	11	1.5
1374	11	1.5
1375	11	1.5
1376	11	1.5
1377	11	1.5
1378	11	1.5
1379	11	1.5
1380	11	1.5
1381	11	1.5
1382	11	1.5
1383	11	1.5
1384	11	1.5
1385	11	1.5
1386	11	1.5
1387	11	1.5
1388	11	1.5
1389	11	1.5
1390	11	1.5
1391	11	1.5
1392	11	1.5
1393	11	1.5
1394	11	1.5
1395	11	1.5
1396	11	1.5
1397	11	1.5
1398	11	1.5
1399	11	1.5
1400	11	1.5
1401	11	1.5
1402	11	1.5
1403	11	1.5
1404	11	1.5
1405	11	1.5
1406	11	1.5
1407	11	1.5
1408	11	1.5
1409	11	1.5
1410	11	1.5
1411	11	1.5
1412	11	1.5
1413	11	1.5
1414	11	1.5
1415	11	1.5
1416	11	1.5
1417	11	1.5
1418	11	1.5
1419	11	1.5
1420	11	1.5
1421	11	1.5
1422	11.3	1.5
1423	11.5	1.5
1424	12	1.5
1425	12	1.5
1426	12	1.5
1427	12	1.5
1428	12	1.5
1429	12	1.5
1430	12	1.5
1431	12	1.5
1432	12	1.5
1433	12	1.5
1434	12	1.5
1435	12	1.5
1436	12	1.5
1437	12	1.5
1438	12	1.5
1439	12	1.5
1440	12	1.5
1441	12	1.5
1442	12	1.5
1443	12	1.5
1444	12	1.5
1445	12	1.5
1446	12	1.5
1447	12	1.5
1448	12	1.5
1449	12	1.5
1450	12	1.5
1451	12	1.5
1452	12	1.5
1453	12	1.5
1454	12	1.5
1455	12	1.5
1456	12	1.5
1457	12	1.5
1458	12	1.5
1459	12	1.5
1460	12	1.5
1461	12	1.5
1462	12	1.5
1463	12	1.5
1464	12	1.5
1465	12	1.5
1466	12	1.5
1467	12	1.5
1468	12	1.5
1469	12	1.5
1470	12	1.5
1471	12	1.5
1472	12	1.5
1473	12	1.5
1474	12	1.5
1475	12	1.5
1476	12	1.5
1477	12	1.5
1478	12	1.5
1479	12	1.5
1480	12	1.5
1481	12	1.5
1482	12	1.5
1483	12	1.5
1484	12	1.5
1485	12	1.5
1486	12	1.5
1487	12	1.5
1488	12	1.5
1489	12	1.5
1490	12	1.5
1491	12	1.5
1492	12	1.5
1493	12	1.5
1494	12	1.5
1495	12	1.5
1496	12	1.5
1497	12	1.5
1498	12	1.5
1499	12	1.5
1500	12	1.5
1501	12	1.5
1502	12	1.5
1503	12	1.5
1504	12	1.5
1505	12	1.5
1506	12	1.5
1507	12.2	1.5
1508	12.5	1.5
1509	13	1.5
1510	13	1.5
1511	13	1.5
1512	13	1.5
1513	13	1.5
1514	13	1.5
1515	13	1.5
1516	13	1.5
1517	13	1.5
1518	13	1.5
1519	13	1.5
1520	13	1.5
1521	13	1.5
1522	13	1.5
1523	13	1.5
1524	13	1.5
1525	13	1.5
1526	13	1.5
1527	13	1.5
1528	13	1.5
1529	13	1.5
1530	13	1.5
1531	13	1.5
1532	13	1.5
1533	13	1.5
1534	13	1.5
1535	13	1.5
1536	13	1.5
1537	13	1.5
1538	13	1.5
1539	13	1.5
1540	13	1.5
1541	13	1.5
1542	13	1.5
1543	13	1.5
1544	13	1.5
1545	13	1.5
1546	13	1.5
1547	13	1.5
1548	13	1.5
1549	13	1.5
1550	13	1.5
1551	13	1.5
1552	13	1.5
1553	13	1.5
1554	13	1.5
1555	13	1.5
1556	13	1.5
1557	13	1.5
1558	13	1.5
1559	13	1.5
1560	13	1.5
1561	13	1.5
1562	13	1.5
1563	13	1.5
1564	13	1.5
1565	13	1.5
1566	13	1.5
1567	13	1.5
1568	13	1.5
1569	13	1.5
1570	13	1.5
1571	13	1.5
1572	13	1.5
1573	13	1.5
1574	13	1.5
1575	13	1.5
1576	13	1.5
1577	13	1.5
1578	13	1.5
1579	13	1.5
1580	13	1.5
1581	13	1.5
1582	13	1.5
1583	13	1.5
1584	13	1.5
1585	13	1.5
1586	13	1.5
1587	13.4	1.5
1588	14	1.5
1589	14	1.5
1590	14	1.5
1591	14	1.5
1592	14	1.5
1593	14	1.5
1594	14	1.5
1595	14	1.5
1596	14	1.5
1597	14	1.5
1598	14	1.5
1599	14	1.5
1600	14	1.5
1601	14	1.5
1602	14	1.5
1603	14	1.5
1604	14	1.5
1605	14	1.5
1606	14	1.5
1607	14	1.5
1608	14	1.5
1609	14	1.5
1610	14	1.5
1611	14	1.5
1612	14	1.5
1613	14	1.5
1614	14	1.5
1615	14	1.5
1616	14	1.5
1617	14	1.5
1618	14	1.5
1619	14	1.5
1620	14	1.5
1621	14	1.5
1622	14	1.5
1623	14	1.5
1624	14	1.5
1625	14	1.5
1626	14	1.5
1627	14	1.5
1628	14	1.5
1629	14	1.5
1630	14	1.5
1631	14	1.5
1632	14	1.5
1633	14	1.5
1634	14	1.5
1635	14	1.5
1636	14	1.5
1637	14	1.5
1638	14	1.5
1639	14	1.5
1640	14	1.5
1641	14	1.5
1642	14	1.5
1643	14	1.5
1644	14	1.5
1645	14	1.5
1646	14	1.5
1647	14	1.5
1648	14	1.5
1649	14	1.5
1650	14	1.5
1651	14	1.5
1652	14	1.5
1653	14	1.5
1654	14.3	1.5
1655	14.4	1.5
1656	15	1.5
1657	15	1.5
1658	15	1.5
1659	15	1.5
1660	15	1.5
1661	15	1.5
1662	15	1.5
1663	15	1.5
1664	15	1.5
1665	15	1.5
1666	15	1.5
1667	15	1.5
1668	15	1.5
1669	15	1.5
1670	15	1.5
1671	15	1.5
1672	15	1.5
1673	15	1.5
1674	15	1.5
1675	15	1.5
1676	15	1.5
1677	15	1.5
1678	15	1.5
1679	15	1.5
1680	15	1.5
1681	15	1.5
1682	15	1.5
1683	15	1.5
1684	15	1.5
1685	15	1.5
1686	15	1.5
1687	15	1.5
1688	15	1.5
1689	15	1.5
1690	15	1.5
1691	15	1.5
1692	15	1.5
1693	15	1.5
1694	15	1.5
1695	15	1.5
1696	15	1.5
1697	15	1.5
1698	15	1.5
1699	15	1.5
1700	15	1.5
1701	15	1.5
1702	15	1.5
1703	15	1.5
1704	15	1.5
1705	15	1.5
1706	15	1.5
1707	15	1.5
1708	15	1.5
1709	15	1.5
1710	15	1.5
1711	15	1.5
1712	15	1.5
1713	15	1.5
1714	15	1.5
1715	15	1.5
1716	15	1.5
1717	15	1.5
1718	15	1.5
1719	15	1.5
1720	15	1.5
1721	15	1.5
1722	15	1.5
1723	15	1.5
1724	15	1.5
1725	15	1.5
1726	15.2	1.5
1727	15.7	1.5
1728	15.9	1.5
1729	16	1.5
1730	16	1.5
1731	16	1.5
1732	16	1.5
1733	16	1.5
1734	16	1.5
1735	16	1.5
1736	16	1.5
1737	16	1.5
1738	16	1.5
1739	16	1.5
1740	16	1.5
1741	16	1.5
1742	16	1.5
1743	16	1.5
1744	16	1.5
1745	16	1.5
1746	16	1.5
1747	16	1.5
1748	16	1.5
1749	16	1.5
1750	16	1.5
1751	16	1.5
1752	16	1.5
1753	16	1.5
1754	16	1.5
1755	16	1.5
1756	16	1.5
1757	16	1.5
1758	16	1.5
1759	16	1.5
1760	16	1.5
1761	16	1.5
1762	16	1.5
1763	16	1.5
1764	16	1.5
1765	16	1.5
1766	16	1.5
1767	16	1.5
1768	16	1.5
1769	16	1.5
1770	16	1.5
1771	16	1.5
1772	16	1.5
1773	16	1.5
1774	16	1.5
1775	16	1.5
1776	16	1.5
1777	16	1.5
1778	16	1.5
1779	16	1.5
1780	16.1	1.5
1781	16.5	1.5
1782	16.6	1.5
1783	16.8	1.5
1784	17	1.5
1785	17	1.5
1786	17	1.5
1787	17	1.5
1788	17	1.5
1789	17	1.5
1790	17	1.5
1791	17	1.5
1792	17	1.5
1793	17	1.5
1794	17	1.5
1795	17	1.5
1796	17	1.5
1797	17	1.5
1798	17	1.5
1799	17	1.5
1800	17	1.5
1801	17	1.5
1802	17	1.5
1803	17	1.5
1804	17	1.5
1805	17	1.5
1806	17	1.5
1807	17	1.5
1808	17	1.5
1809	17	1.5
1810	17	1.5
1811	17	1.5
1812	17	1.5
1813	17	1.5
1814	17	1.5
1815	17	1.5
1816	17	1.5
1817	17	1.5
1818	17	1.5
1819	17	1.5
1820	17	1.5
1821	17	1.5
1822	17	1.5
1823	17	1.5
1824	17	1.5
1825	17	1.5
1826	17	1.5
1827	17	1.5
1828	17	1.5
1829	17	1.5
1830	17	1.5
1831	17	1.5
1832	17	1.5
1833	17	1.5
1834	17	1.5
1835	17	1.5
1836	17	1.5
1837	17	1.5
1838	17	1.5
1839	17	1.5
1840	17	1.5
1841	17.1	1.5
1842	18	1.5
1843	18	1.5
1844	18	1.5
1845	18	1.5
1846	18	1.5
1847	18	1.5
1848	18	1.5
1849	18	1.5
1850	18	1.5
1851	18	1.5
1852	18	1.5
1853	18	1.5
1854	18	1.5
1855	18	1.5
1856	18	1.5
1857	18	1.5
1858	18	1.5
1859	18	1.5
1860	18	1.5
1861	18	1.5
1862	18	1.5
1863	18	1.5
1864	18	1.5
1865	18	1.5
1866	18	1.5
1867	18	1.5
1868	18	1.5
1869	18	1.5
1870	18	1.5
1871	18	1.5
1872	18	1.5
1873	18	1.5
1874	18	1.5
1875	18	1.5
1876	18	1.5
1877	18	1.5
1878	18	1.5
1879	18	1.5
1880	18	1.5
1881	18	1.5
1882	18	1.5
1883	18	1.5
1884	18	1.5
1885	18	1.5
1886	18	1.5
1887	18	1.5
1888	18	1.5
1889	18	1.5
1890	18	1.5
1891	18	1.5
1892	18	1.5
1893	18	1.5
1894	18	1.5
1895	18	1.5
1896	18	1.5
1897	18	1.5
1898	18	1.5
1899	18.2	1.5
1900	18.5	1.5
1901	18.7	1.5
1902	18.8	1.5
1903	18.9	1.5
1904	19	1.5
1905	19	1.5
1906	19	1.5
1907	19	1.5
1908	19	1.5
1909	19	1.5
1910	19	1.5
1911	19	1.5
1912	19	1.5
1913	19	1.5
1914	19	1.5
1915	19	1.5
1916	19	1.5
1917	19	1.5
1918	19	1.5
1919	19	1.5
1920	19	1.5
1921	19	1.5
1922	19	1.5
1923	19	1.5
1924	19	1.5
1925	19	1.5
1926	19	1.5
1927	19	1.5
1928	19	1.5
1929	19	1.5
1930	19	1.5
1931	19	1.5
1932	19	1.5
1933	19	1.5
1934	19	1.5
1935	19	1.5
1936	19	1.5
1937	19	1.5
1938	19	1.5
1939	19	1.5
1940	19	1.5
1941	19	1.5
1942	19	1.5
1943	19	1.5
1944	19	1.5
1945	19	1.5
1946	19	1.5
1947	19	1.5
1948	19	1.5
1949	19.5	1.5
1950	19.8	1.5
1951	19.9	1.5
1952	20	1.5
1953	20	1.5
1954	20	1.5
1955	20	1.5
1956	20	1.5
1957	20	1.5
1958	20	1.5
1959	20	1.5
1960	20	1.5
1961	20	1.5
1962	20	1.5
1963	20	1.5
1964	20	1.5
1965	20	1.5
1966	20	1.5
1967	20	1.5
1968	20	1.5
1969	20	1.5
1970	20	1.5
1971	20	1.5
1972	20	1.5
1973	20	1.5
1974	20	1.5
1975	20	1.5
1976	20	1.5
1977	20	1.5
1978	20	1.5
1979	20	1.5
1980	20	1.5
1981	20	1.5
1982	20	1.5
1983	20	1.5
1984	20	1.5
1985	20	1.5
1986	20	1.5
1987	20	1.5
1988	20	1.5
1989	20	1.5
1990	20	1.5
1991	20	1.5
1992	20	1.5
1993	20	1.5
1994	20	1.5
1995	20	1.5
1996	20	1.5
1997	20	1.5
1998	20	1.5
1999	20	1.5
[truncated: 2,796 more rows]

## Sheet: Switzerland 2010-2013
fruit body	g	maturation %
1	10	0.924562
2	4	0.0177632
3	2	0
4	8	0.873471
5	32	0
6	40	0
7	30	0
8	34	0.82289
9	8	0.00645161
10	36	0.842615
11	34	0.457414
12	14	0.147369
13	8	0.368187
14	24	0.488225
15	8	0.691618
16	12	0.134055
17	4	0.18854
18	4	0.961812
19	1.5	0.959258
20	22	0
21	36	0.250963
22	12	0.850636
23	42	0
24	16	0.859729
25	10	0.940579
26	48	0.605508
27	18	0.285819
28	86	0
29	74	0
30	72	0
31	38	0
32	58	0.882583
33	32	0
34	32	0.376887
35	36	0.713053
36	4	0.78926
37	10	0.118957
38	46	0.20423
39	18	0.566152
40	32	0.922547
41	14	0.925753
42	72	0.953635
43	54	0
44	44	0.702803
45	10	0.478491
46	66	0
47	62	0.838168
48	60	0.143648
49	30	0.980784
50	24	0.907785
51	98	0.0108696
52	24	0
53	28	0.91528
54	14	0.26
55	38	0.86
56	74	0
57	8	0.57
58	26	0.61
59	10	0.79
60	76	0.81
61	46	0.79
62	46	0
63	32	0
64	10	0
65	14	0.07
66	4	0
67	10	0.09
68	38	0.93
69	14	0
70	65	0.87
71	20	0.99
72	90	0.94
73	10	0.72
74	94	0.94
75	8	0
76	4	0.96
77	4	0
78	16	0.92
79	132	0.8
80	6	0.85
81	22	0.88
